# Supplementary material for: Dehydroepiandrosterone Supplementation and the Impact of Follicular Fluid Metabolome and Cytokinome Profiles in Poor Ovarian Responders
Source: Research Square preprint supplement (doi:10.21203/rs.3.rs-1314035/v1), 2022-02-07
Supplement: Supplementary file 2 [file 30e37c597f0ced592b65d9de.xlsx]

## Sheet: Sheet1
Table 1. Baseline characteristics of poor ovarian responder patients in this study
	DHEA+ group (n = 28)	DHEA- group (n = 24)
Age (year), mean (SD)	37 (3)	36 (4)
BMI (kg/m2), mean (SD)	23 (5)	24 (5)
Race, n (%)
Chinese	21 (75.0)	14 (58.3)
Malay	0 (0.0)	8 (33.3)
Indian	1 (3.6)	2 (8.4)
Others	6 (21.4)	0 (0.0)
Primary infertility, n (%)
Yes	19 (67.9)	13 (54.2)
No	9 (32.1)	11 (45.8)
Infertility duration (years), median (range)	4 (1-16)	4 (1-11)
Primary infertility diagnosis, n (%)
Male factor	22 (78.6)	17 (70.8)
Tubal factor	1 (3.6)	1 (4.2)
Endometriosis	1 (3.6)	2 (8.3)
Low ovarian reserve	3 (10.6)	4 (16.7)
Others	1 (3.6)	0 (0.0)
Cycle number n (%)
Cycle 1	4 (14.3)	12 (50.0)
Cycle 2 & above	22 (78.6)	12 (50.0)
Basal FSH (IU/L) , mean (range)*	8.4 (4.8-27.7)	6.5 (3.6-16.6)
Estradiol (pmol/L) , mean (range)*	98.7 (37.0-320.0)	92.4 (37.0-273.0)
AMH (ng/ml) , mean (range)*	0.7 (0.2-2.8)	0.8 (0.2-2.7)
Free Testosterone (pmol/L), mean (range)*	2.0 (0.5-14.3)	1.7 (0.9-2.9)
DHEA-S (µmol/L), mean (range)*	4.0 (0.5-17.3)	3.8 (0.9-10.0)
Antral follicle count, mean (range)*	4.6 (1-15)	5.1 (0-12)
Ovarian volume RO (cm3), mean (range)*	7.3 (1.9-24.0)	7.7 (2.0-29.5)
Ovarian volume LO (cm3), mean (range)*	5.1 (1.8-16.6)	8.2 (2.4-26.7)
* Blood baseline parameters, antral follicle count and ovarian volumes were obtained in 27 patients in the DHEA group and 20 patients in the control group and were summarized by geometric mean (range).
