# Supplementary material for: Dehydroepiandrosterone Supplementation and the Impact of Follicular Fluid Metabolome and Cytokinome Profiles in Poor Ovarian Responders
Source: Research Square preprint supplement (doi:10.21203/rs.3.rs-1314035/v1), 2022-02-07
Supplement: Supplementary file 6 [file 1ef6cd076a52961b5a5cb599.xlsx]

## Sheet: Sheet1
Table 2. Primary and secondary outcomes between DHEA+ and DHEA - control groups
	DHEA+ group	DHEA- control group	Effect estimate$	p-value
	(n = 28)	(n = 24)	(95% CI)
Clinical outcomes
Clinical pregnancy, n (%)	2 (7.1)	3 (12.5)	0.57 (0.10-3.14)	0.652
No. of oocytes retrieved, mean (SD)	5.2 (2.9)	4.5 (3.6)	0.7 (-1.4 to 2.9)	0.507
No. of metaphase II oocytes, mean (SD)	4.0 (2.5)	3.5 (2.2)	0.6 (-1.0 to 2.1)	0.459
No. of embryos, mean (SD)	2.7 (2.4)	2.3 (1.8)	0.4 (-1.1 to 1.8)	0.601
Embryos transferred, n (%)
0	5 (23.8)	3 (17.7)	1
1	9 (42.9)	5 (29.4)	1.03 (0.53 to 2.00)	1
2	7 (33.3)	9 (52.9)	0.78 (0.44 to 1.39)	0.667
Hormonal outcomes^
DHEA-S (µg/ml)	870.73 (96.00-3385.57)	182.45 (47.25-589.19)	4.77 (2.83 to 8.04)	< 0.001
Free Testosterone (pg/ml)	87.68 (19.54-457.86)	25.50 (11.56-202.89)	3.44 (2.12 to 5.59)	< 0.001
Estradiol (x105) (pg/ml)	17.2 (6.15-137.00)	14.7 (2.15-32.5)	1.17 (0.67 to 2.02)	0.571
AMH (ng/ml)	1.37 (0.21-12.60)	1.56 (0.39-6.12)	0.88 (0.45 to 1.70)	0.687
IGF1 (ng/ml)	0.23 (0.01-18.84)	0.23 (0.08-14.22)	0.99 (0.37 to 2.63)	0.976
$ The effect estimate refers to relative risk for clinical pregnancy, absolute mean difference for cycle outcomes and relative mean difference for hormonal biomarkers (ratio of geometric means).
^ Hormones’ concentration in follicular fluid of the leading follicle, are summarized by geometric mean (range).
