# Supplementary material for: Dehydroepiandrosterone Supplementation and the Impact of Follicular Fluid Metabolome and Cytokinome Profiles in Poor Ovarian Responders
Source: Research Square preprint supplement (doi:10.21203/rs.3.rs-1314035/v1), 2022-02-07
Supplement: Supplementary file 7 [file 668f38a23cda4b8270e4dd72.xlsx]

## Sheet: Sheet2
Table 4. List of identified follicular fluid metabolites.
No.	HMDB No.	Accurate mass	Theoretical mass	Compound Name	Chemical formula	Pathway
1	HMDB01859	151.063	151.063	Acetaminophen	C8H9NO2	Acetaminophen metabolism
2	HMDB04987	261.121	261.132	Alpha-Aspartyl-lysine	C10H19N3O5	Amino acid metabolism
3	HMDB03423/HMDB00641	146.069	146.069	D-Glutamine/L-Glutamine	C5H10N2O3	Amino acid metabolism
4	HMDB00714	179.058	179.058	Hippuric acid	C9H9NO3	Amino acid metabolism
5	HMDB00161/HMDB01310/ HMDB00271	89.0465	89.0477	L-Alanine/D-Alanine/Sarcosine	C3H7NO2	Amino acid metabolism
6	HMDB00641/HMDB03423	146.069	146.069	L-Glutamine/ D-Glutamine	C5H10N2O3	Amino acid metabolism
7	HMDB00687/HMDB00557/HMDB00172/HMDB01645	131.094	131.095	L-Leucine/L-Alloisoleucine/ L-Isoleucine/L-Norleucine	C6H13NO2	Amino acid metabolism
8	HMDB00696	149.05	149.051	L-Methionine	C5H11NO2S	Amino acid metabolism
9	HMDB00162	115.063	115.063	L-Proline	C5H9NO2	Amino acid metabolism
10	HMDB00883/HMDB00043	117.078	117.079	L-Valine/Betaine	C5H11NO2	Amino acid metabolism
11	HMDB00064/HMDB00766	131.069	131.069	Creatine/ N-Acetyl-L-alanine	C4H9N3O2	Arginine, proline, glycine and serine metabolism
12	HMDB00043/HMDB02141	117.079	117.079	Betaine/ N-Methyl-a-aminoisobutyric acid	C5H11NO2	Betaine Metabolism
13	HMDB01847	194.08	194.08	Caffeine	C8H10N4O2	Caffeine metabolism
14	HMDB01860	180.064	180.065	Paraxanthine	C7H8N4O2	Caffeine metabolism
15	HMDB02825	180.064	180.065	Theobromine	C7H8N4O2	Caffeine metabolism
16	HMDB00062	161.105	161.105	L-Carnitine	C7H15NO3	Fatty acid metabolism
17	HMDB00267/HMDB00805	129.042	129.043	Pyroglutamic acid/ Pyrrolidonecarboxylic acid	C5H7NO3	Glutathione metabolism
18	HMDB00017	183.053	183.053	4-Pyridoxic acid	C8H9NO4	Vitamin B6 metabolism
19	HMDB00995	312.209	312.209	16-Dehydroprogesterone	C21H28O2	Lipid metabolism
20	HMDB00502	388.249	406.272	3-Oxocholic acid	C24H38O5	Lipid metabolism
21	HMDB00308	356.271	374.282	3b-Hydroxy-5-cholenoic acid	C5H4N4O3	Lipid metabolism
22	HMDB00501	400.334	400.334	7-Ketocholesterol	C27H44O2	Lipid metabolism
23	HMDB00503	372.266	390.277	7a-Hydroxy-3-oxo-5b-cholanoic acid	C24H38O4	Lipid metabolism
24	HMDB00784	188.104	188.105	Azelaic acid	C9H16O4	Lipid metabolism
25	HMDB00015/HMDB01547	346.213	346.214	Cortexolone/Corticosterone	C21H30O4	Lipid metabolism
26	HMDB01547	346.214	346.214	Corticosterone	C21H30O4	Lipid metabolism
27	HMDB00063	362.209	362.209	Cortisol	C21H30O5	Lipid metabolism
28	HMDB00631	449.313	449.314	Deoxycholic acid glycine conjugate	C26H43NO5	Lipid metabolism
29	HMDB00573/HMDB03231	282.256	282.256	Elaidic acid/Vaccenic acid	C18H34O2	Lipid metabolism
30	HMDB00628/HMDB00234	288.208	288.209	Epitestosterone/Testosterone	C19H28O2	Lipid metabolism
31	HMDB00086	257.103	257.103	Glycerophosphocholine	C8H20NO6P	Lipid metabolism
32	HMDB00138	465.31	465.309	Glycocholic acid	C26H43NO6	Lipid metabolism
33	HMDB02259	270.256	270.256	Heptadecanoic acid	C17H34O2	Lipid metabolism
34	HMDB00666	130.099	130.099	Heptanoic acid	C7H14O2	Lipid metabolism
35	HMDB00689	116.083	116.084	Isocaproic acid	C6H12O2	Lipid metabolism
36	HMDB00673	280.24	280.24	Linoleic acid	C18H32O2	Lipid metabolism
37	HMDB00806	228.209	228.209	Myristic acid	C14H28O2	Lipid metabolism
38	HMDB00593	785.594	785.593	PC(18:1/18:1)	C44H84NO8P	Lipid metabolism
39	HMDB00847	158.13	158.131	Pelargonic acid	C9H18O2	Lipid metabolism
40	HMDB00253	316.24	316.24	Pregnenolone	C21H32O2	Lipid metabolism
41	HMDB01830	314.224	314.225	Progesterone	C21H30O2	Lipid metabolism
42	HMDB00792	202.119	202.121	Sebacic acid	C10H18O4	Lipid metabolism
43	HMDB00933	228.133	228.136	Traumatic acid	C12H20O4	Lipid metabolism
44	HMDB03231	282.255	282.256	Vaccenic acid	C18H34O2	Lipid metabolism
45	HMDB01877	144.115	144.115	Valproic acid	C8H16O2	Lipid metabolism
46	HMDB00876	384.339	384.339	Vitamin D3	C27H44O	Lipid metabolism
47	HMDB00182/HMDB03405	146.105	146.106	L-lysine/D-lysine	C6H14N2O2	Lysinuric protein intolerance
48	HMDB01923	230.094	230.094	Naproxen	C14H14O3	Naproxen action pathway
49	HMDB06344	264.11	264.111	Alpha-N-phenylacetyl-L-glutamine	C13H16N2O4	Phenylacetate Metabolism
50	HMDB00159	165.078	165.189	L-Phenylalanine	C9H11NO2	Phenylalanine metabolism
51	HMDB00097	103.099	104.108	Choline	C5H14NO	Phosphatidylcholine biosynthesis
52	HMDB00157	136.038	136.039	Hypoxanthine	C5H4N4O	Purine metabolism
53	HMDB00289	168.028	168.028	Uric acid	C5H4N4O3	Purine metabolism
54	HMDB00926	79.0421	79.0422	Pyridine	C5H5N	Pyridine biosynthesis
55	HMDB00975/HMDB00055	324.105	342.116	Trehalose/Cellobiose	C12H22O11	Pyrimidine metabolism
56	HMDB00300	112.027	112.027	Uracil	C4H4N2O2	Pyrimidine metabolism
57	HMDB00190/HMDB01311	90.0311	90.0317	L-Lactic acid/D-Lactic acid	C3H6O3	Pyruvate metabolism
58	HMDB00252	299.282	299.282	Sphingosine	C18H37NO2	Sphingolipid Metabolism
59	HMDB00374/HMDB00016/HMDB00920	330.218	330.219	17-Hydroxyprogesterone/ Deoxycorticosterone/11a-Hydroxyprogesterone	C21H30O3	Steroid biosynthesis
60	HMDB00929	204.089	204.09	L-Tryptophan	C11H12N2O2	Tryptophan metabolism
61	HMDB00197	175.063	175.063	Indoleacetic acid	C10H9NO2	Tryptophan metabolism
62	HMDB00183	208.084	208.085	L-Kynurenine	C10H12N2O3	Tryptophan metabolism
63	HMDB00158/HMDB06050	181.073	181.074	L-Tyrosine/o-Tyrosine	C9H11NO3	Tyrosine metabolism
64	HMDB02302	189.078	189.079	3-Indolepropionic acid	HMDB02302	Tryptophan deamination
65	HMDB01924	266.162	266.163	Atenolol	C14H22N2O3	Beta1-receptor inhibition
66	HMDB06115	106.042	106.042	Benzaldehyde	C7H6O	Oxidoreductase activity
67	HMDB00562	113.059	113.059	Creatinine	C4H7N3O	Arginine, proline, glycine and serine Metabolism/creatine catabolism
68	HMDB00453	114.067	114.068	Delta-hexanolactone	C6H10O2	Hydroxy acid lactonization
69	HMDB04983	94.0084	94.0089	Dimethyl sulfone	C2H6O2S	Methanethiol metabolism
70	HMDB01888	73.0524	73.0528	N,N-Dimethylformamide	C3H7NO	Tertiary carboxylic acid metabolism
71	HMDB00070	129.078	129.079	Pipecolic acid	C6H11NO2	Amino acid metabolism
