# Supplementary material for: Dehydroepiandrosterone Supplementation and the Impact of Follicular Fluid Metabolome and Cytokinome Profiles in Poor Ovarian Responders
Source: Research Square preprint supplement (doi:10.21203/rs.3.rs-1314035/v1), 2022-02-07
Supplement: Supplementary file 8 [file 6fe0ae6da80eabb3f62da613.xlsx]

## Sheet: Sheet1
Table 3. Comparison of AFC, ovarian volume and hormonal test at baseline and after 4 months of treatment in the DHEA group
Parameters*	4-month	Baseline	Relative mean difference, RMD$	p-value
	(n = 24)	(n = 24)	(95% CI)
Basal FSH (IU/L)	6.8 (1.2-24.2)	8.7 (4.8-27.7)	0.78 (0.61-1.00)	0.052
Estradiol (pmol/L)	141.8 (56.0-290.0)	94.3 (37.0-320.0)	1.50 (1.24-1.83)	< 0.001
AMH (ng/ml)	0.6 (0.2-2.0)	0.6 (0.2-2.8)	0.99 (0.71-1.36)	0.932
Free Testosterone (pmol/L)	4.6 (2.0-9.5)	2.1 (0.8-14.3)	2.25 (1.74-2.91)	< 0.001
DHEA-S (umol/L)	14.3 (4.5-31.2)	4.3 (0.8-17.3)	3.35 (2.42-4.63)	< 0.001
Antral follicle count	4.4 (1-11)	4.6 (1-15)	0.96 (0.65-1.44)	0.854
Ovarian volume RO (cm3)	5.5 (0.9-14.3)	7.0 (1.9-24.0)	0.74 (0.47-1.16)	0.176
Ovarian volume LO (cm3)	5.2 (1.6-16.8)	4.8 (1.8-10.6)	1.10 (0.84-1.43)	0.472
* Summarized by geometric mean (range).
$ Ratio of geometric means.
